# Supplementary material
Source: PubMed Central journal article supplement (PMC8743447)
Supplement: mmc1.pdf [file mmc1.pdf]

Choi, S. L., & Martin, P., Cho, J., Ryou, Y., & Heinz, M. (2022). Personality and compliance with COVID-19 protective measures among older Americans: Moderating effects of age, gender, and race/ethnicity. *Personality and Individual Differences*. <https://doi.org/10.1016/j.paid.2022.111499>

## Supplementary Material

### Measurements

#### *Covariates*

*Health* variables have been investigated when researchers examined the association between chronic diseases and preventive health behaviors. Participants who had chronic diseases were more likely to comply with preventive behaviors. People reporting chronic diseases showed an additional 2% higher prevalence of washing or sanitizing hands (Islam et al., 2021). However, the opposite result was also found in Zareipour and colleagues' (2020) study. Participants who had at least one chronic disease reported less adoption of preventive behaviors than others. *Health* covariates included self-rated memory (range: 1 = poor; 5 = excellent), COVID-19 diagnosis, self-rated health (range: 1 = poor; 5 = excellent), comorbidity (high blood pressure, diabetes, cancer, lung disease, heart problems, stroke, psychiatric problems, and arthritis, range: 0 to 8), and depressive symptoms (range: 0 to 8). Depressive symptoms were assessed using a subset of items from the Center for Epidemiologic Studies Depression (CES-D) Scale (Radloff, 1977;  $\alpha = .79$ ). COVID-19 diagnosis of respondent and respondent's close social ties were assessed with the four items: (a) "Have you had or do you now have COVID-19, the disease caused by the novel coronavirus?"; (b) "Has anyone in your household other than you been diagnosed with COVID-19?"; (c) "Has anyone else you know been diagnosed with COVID-19?"; and (d) "Has anyone you know died from COVID-19?" (1 = yes; 0 = no).

*Sociodemographic* variables included marital status [married or partnered; separated, divorced, widowed, or never married (reference)], years of educational attainment, and employment status [currently working; not working (reference)]. As family variables, we included the number of living children and siblings. Total household income and total household wealth were included as financial status variables. To reduce skewness, we used the natural logarithm for household income and household wealth.

*Psychosocial* variables included religious beliefs and social support. Given established linkages of religion with a range of cultural factors as well as health behaviors (Koffman et al., 2008; Li et al., 2016; Schlundt et al., 2008), we adjusted for religious beliefs, meaning, and values. Religious beliefs, meaning and values (Fetzer Institute, 2003) were assessed with the questions, "How much do you agree or disagree with each of the following statements: (a) I believe in a God who watches over me; (b) The events in my life unfold according to a divine or greater plan; (c) I try hard to carry my religious beliefs over into all my other dealings in life; and (d) I find strength and comfort in my religion." Responses were rated from 1 (*strongly disagree*) to 6 (*strongly agree*), and an average score was calculated from responses to four items ( $\alpha = .93$ ). Higher scores corresponded to higher levels of religious beliefs, meaning, and values.

Evidence suggests psychosocial factors, particularly social support, also play a key role in facilitating preventive health behaviors (Haber et al., 2007; Han et al., 2019; Paykani et al.,

2020). Prior studies showed gender differences in the association between perceived social support from spouses and friends and preventive healthcare behaviors among older couples (e.g., Han et al., 2019). Interestingly, Paykani et al. (2020) indicated that perceived social support from family members was associated with less compliance with physical distancing, whereas perceived social support from friends was associated with greater compliance (Paykani et al., 2020). Respondents were also asked to rate both receiving and giving social support, particularly financial help and shopping for groceries, errands, rides, or chores. *Receiving social support* was assessed with the questions, “The coronavirus pandemic has affected many aspects of families’ lives and many people have needed help even if they were not actually infected. Because of the coronavirus pandemic, did anyone living outside your household, such as a parent, adult child, other relatives, or friends, help you (and your spouse/partner) with (a) money or by paying bills; and (b) shopping for groceries, errands, rides, or chores?” (1 = *yes*; 0 = *no*). Next, respondents were asked to rate their *giving social support* with the questions, “Because of the coronavirus pandemic, have you (and your spouse/partner) helped anyone living outside your household, such as a parent, child, other relatives, or friends, with (a) money or paying their bills?; and (b) shopping for groceries, errands, rides, or chores?” (1 = *yes*; 0 = *no*).

### **Results on Health, Psychosocial, and Sociodemographic Characteristics Associated with COVID-19 Protective Measures**

Individuals who had medical comorbidities were more likely to wear a mask. Knowing someone who had died from COVID-19 was significantly associated with taking precautionary protective health measures. Older adults who had received social support from close social ties due to the COVID-19 pandemic were significantly more likely to wash hands frequently. Older Americans who have given social support to close social ties because of the COVID-19 pandemic were significantly more likely to comply with COVID-19 protective measures of practicing keeping distancing and using sanitizers. Older adults who had higher levels of religious beliefs, meaning, and values were significantly less likely to comply with COVID-19 protective measures of wearing a mask and physical distancing. However, we found no evidence that marital status, the number of living children and siblings, educational attainment, employment status, total household income, and wealth were associated with compliance with COVID-19 protective measures among older Americans (results are available upon request).

### References

- Fetzer Institute. (2003). Brief Multidimensional Measure of Religiousness/Spirituality: 1999. In N. W. Group (Ed.), *Multidimensional measurement of religiousness/spirituality for use in health research: A report of the Fetzer Institute/National Institute on Aging Working Group* (2nd ed., pp. 85-88). Kalamazoo, MI: John E. Fetzer Institute.
- Haber, M. G., Cohen, J. L., Lucas, T., & Baltes, B. B. (2007). The relationship between self-reported received and perceived social support: A meta-analytic review. *American Journal of Community Psychology, 39*(1), 133-144. <https://doi.org/10.1007/s10464-007-9100-9>
- Han, S. H., Kim, K., & Burr, J. A. (2019). Social support and preventive healthcare behaviors among couples in later life. *The Gerontologist, 59*(6), 1162-1170. <https://doi.org/10.1093/geront/gny144>
- Islam, J. Y., Vidot, D. C., & Camacho-Rivera, M. (2021). Determinants of COVID-19 preventive behaviours among adults with chronic diseases in the USA: An analysis of the nationally representative COVID-19 impact survey. *BMJ Open, 11*(2), e044600. <https://doi.org/10.1136/bmjopen-2020-044600>
- Koffman, J., Morgan, M., Edmonds, P., Speck, P., & Higginson, I. J. (2008). "I know he controls cancer": The meanings of religion among Black Caribbean and White British patients with advanced cancer. *Social Science & Medicine, 67*(5), 780-789. <https://doi.org/10.1016/j.socscimed.2008.05.004>
- Li, S., Stampfer, M. J., Williams, D. R., & VanderWeele, T. J. (2016). Association of religious service attendance with mortality among women. *JAMA Internal Medicine, 176*(6), 777-785. <https://doi.org/10.1001/jamainternmed.2016.1615>
- Paykani, T., Zimet, G. D., Esmaeili, R., Khajedaluae, A. R., & Khajedaluae, M. (2020). Perceived social support and compliance with stay-at-home orders during the COVID-19 outbreak: evidence from Iran. *BMC Public Health, 20*(1), 1650. <https://doi.org/10.1186/s12889-020-09759-2>
- Radloff, L. S. (1977). The CES-D scale: A self-report depression scale for research in the general population. *Applied Psychological Measurement, 1*(3), 385-401. <https://doi.org/10.1177/014662167700100306>
- Schlundt, D. G., Franklin, M. D., Patel, K., McClellan, L., Larson, C., Niebler, S., & Hargreaves, M. (2008). Religious affiliation, health behaviors and outcomes: Nashville REACH 2010. *American Journal of Health Behavior, 32*(6), 714-724. <https://doi.org/10.5555/ajhb.2008.32.6.714>
- Zareipour, M. A., Ardakani, M. F., Moradali, M. R., Jadgal, M. S., & Movahed, E. (2020). Determinants of COVID-19 prevention behavior in the elderly in Urmia: Application of Health Belief Model. *Open Access Macedonian Journal of Medical Sciences, 8*(T1), 646-650. <https://doi.org/10.3889/oamjms.2020.5653>

Supplementary Table 1. Sample characteristics, HRS COVID-19 sample, 2020 ( $N = 1,006$ )

| Variables                                            | Mean $\pm$ <i>SD</i> (Median) or <i>n</i> (%) |
|------------------------------------------------------|-----------------------------------------------|
| <i>Demographic and socioeconomic characteristics</i> |                                               |
| Age (in years)                                       | 65.97 $\pm$ 8.02 (65)                         |
| 50-59 years old                                      | 207 (20.6)                                    |
| 60-69 years old                                      | 494 (49.1)                                    |
| 70-79 years old                                      | 264 (26.2)                                    |
| 80 years and older                                   | 41 (4.1)                                      |
| Gender                                               |                                               |
| Men                                                  | 440 (43.7)                                    |
| Women                                                | 566 (56.3)                                    |
| Race/ethnicity                                       |                                               |
| non-Hispanic White                                   | 667 (66.3)                                    |
| non-Hispanic Black                                   | 177 (17.6)                                    |
| Hispanic of any race                                 | 117 (11.6)                                    |
| non-Hispanic Other race                              | 45 (4.5)                                      |
| Marital status                                       |                                               |
| Married or partnered                                 | 640 (63.6)                                    |
| Separated or divorced                                | 178 (17.7)                                    |
| Widowed                                              | 118 (11.7)                                    |
| Never married                                        | 70 (7.0)                                      |
| Number of living children                            | 2.65 $\pm$ 1.85 (2)                           |
| Number of living siblings                            | 3.21 $\pm$ 2.60 (3)                           |
| Years of education                                   | 13.06 $\pm$ 3.22 (13)                         |
| Employment status                                    |                                               |
| Currently working                                    | 298 (29.6)                                    |
| Not working                                          | 708 (70.4)                                    |
| Total household income (\$)                          | 100,768.08 $\pm$ 142,584.58 (65,712)          |
| Total household wealth (\$)                          | 561,484.81 $\pm$ 1,161,679.37 (176,500)       |
| <i>Psychosocial variables</i>                        |                                               |
| Religious beliefs, values, and meaning (1-6)         | 4.77 $\pm$ 1.58 (5)                           |
| Social support                                       |                                               |
| Received social support                              |                                               |
| Yes                                                  | 174 (17.3)                                    |
| No                                                   | 832 (82.7)                                    |
| Gave social support                                  |                                               |
| Yes                                                  | 444 (44.1)                                    |
| No                                                   | 562 (55.9)                                    |
| <i>Health characteristics</i>                        |                                               |
| COVID-19 diagnosis                                   |                                               |
| Respondent or household member had COVID-19          | 30 (3.0)                                      |
| Anyone else respondent knows had COVID-19            | 373 (37.1)                                    |
| Anyone respondent knows died from COVID-19           | 194 (19.3)                                    |
| Memory (1-5)                                         | 3.09 $\pm$ 0.89 (3)                           |
| Self-rated health (1-5)                              | 3.24 $\pm$ 0.98 (3)                           |
| Comorbidity (0-8)                                    | 2.21 $\pm$ 1.43 (2)                           |

|                                                           |                 |
|-----------------------------------------------------------|-----------------|
| Depressive symptoms (0-8)                                 | 1.05 ± 1.70 (0) |
| <i>Personality traits (1-4)</i>                           |                 |
| Neuroticism                                               | 1.94 ± 0.61 (2) |
| Extraversion                                              | 3.18 ± 0.54 (3) |
| Openness                                                  | 3.00 ± 0.54 (3) |
| Agreeableness                                             | 3.52 ± 0.49 (3) |
| Conscientiousness                                         | 3.31 ± 0.40 (3) |
| <i>Compliance with COVID-19 protective measures (1-3)</i> |                 |
| Worn a mask                                               | 2.82 ± 0.42 (3) |
| Frequent handwashing                                      | 2.85 ± 0.39 (3) |
| Kept distancing                                           | 2.83 ± 0.41 (3) |
| Used sanitizers                                           | 2.67 ± 0.55 (3) |

---

Supplementary Table 2. OLS regression predicting wearing a mask and frequent handwashing during the COVID-19 pandemic, 2020 HRS ( $N = 1,006$ )

| Variables                              | Worn a Mask |           |          |           |           | Frequent Handwashing |          |          |          |          |
|----------------------------------------|-------------|-----------|----------|-----------|-----------|----------------------|----------|----------|----------|----------|
|                                        | Model 1     | Model 2   | Model 3  | Model 4   | Model 5   | Model 1              | Model 2  | Model 3  | Model 4  | Model 5  |
| <i>Main effects</i>                    |             |           |          |           |           |                      |          |          |          |          |
| <i>Personality traits</i>              |             |           |          |           |           |                      |          |          |          |          |
| Neuroticism                            | -0.044      | -0.065†   | -0.109   | -0.124*   | -0.062    | -0.020               | -0.026   | -0.021   | -0.094†  | 0.002    |
| Extraversion                           | -0.128**    | -0.138*** | -0.268** | -0.252*** | -0.198*** | 0.041                | 0.005    | -0.016   | 0.031    | -0.038   |
| Openness                               | 0.131***    | 0.145***  | 0.112    | 0.191**   | 0.176***  | -0.006               | 0.030    | -0.027   | 0.003    | 0.055    |
| Agreeableness                          | 0.058       | 0.036     | 0.168†   | 0.045     | 0.057     | 0.130***             | 0.090*   | 0.220*   | 0.107†   | 0.155*** |
| Conscientiousness                      | 0.010       | 0.022     | 0.056    | -0.022    | 0.027     | 0.039                | 0.043    | 0.087    | 0.100†   | 0.080†   |
| <i>Age</i>                             |             |           |          |           |           |                      |          |          |          |          |
| Age 50-59 (ref.)                       |             |           |          |           |           |                      |          |          |          |          |
| Age 60-69                              |             | 0.029     | 0.029    | 0.030     | 0.028     |                      | 0.093*   | 0.094*   | 0.091*   | 0.094*   |
| Age 70-79                              |             | 0.082†    | 0.082†   | 0.083†    | 0.078†    |                      | 0.073    | 0.068    | 0.069    | 0.072    |
| Age 80+                                |             | 0.063†    | 0.085*   | 0.059†    | 0.064†    |                      | 0.049    | 0.063†   | 0.051    | 0.049    |
| <i>Gender</i>                          |             |           |          |           |           |                      |          |          |          |          |
| Men (ref.)                             |             |           |          |           |           |                      |          |          |          |          |
| Women                                  |             | 0.133***  | 0.131*** | 0.135***  | 0.132***  |                      | 0.119*** | 0.119*** | 0.120*** | 0.120*** |
| <i>Race/ethnicity</i>                  |             |           |          |           |           |                      |          |          |          |          |
| Non-Hispanic White (ref.)              |             |           |          |           |           |                      |          |          |          |          |
| Non-Hispanic Black (Black)             |             | 0.117***  | 0.121*** | 0.123***  | 0.111**   |                      | 0.093**  | 0.089*   | 0.093**  | 0.088*   |
| Hispanic                               |             | 0.177***  | 0.180*** | 0.172***  | 0.170***  |                      | 0.108**  | 0.108**  | 0.113*** | 0.109**  |
| Non-Hispanic Other race (Other)        |             | 0.096**   | 0.093**  | 0.096**   | 0.108***  |                      | 0.099**  | 0.096**  | 0.096**  | 0.096**  |
| <i>Interaction effects</i>             |             |           |          |           |           |                      |          |          |          |          |
| <i>Personality traits × Age groups</i> |             |           |          |           |           |                      |          |          |          |          |
| Neuroticism × Age 60-69                |             |           | -0.010   |           |           |                      |          | -0.009   |          |          |
| Neuroticism × Age 70-79                |             |           | 0.066    |           |           |                      |          | -0.018   |          |          |
| Neuroticism × Age 80+                  |             |           | 0.036    |           |           |                      |          | 0.039    |          |          |
| Extraversion × Age 60-69               |             |           | 0.143†   |           |           |                      |          | -0.023   |          |          |
| Extraversion × Age 70-79               |             |           | 0.071    |           |           |                      |          | 0.101†   |          |          |
| Extraversion × Age 80+                 |             |           | -0.063   |           |           |                      |          | -0.046   |          |          |
| Openness × Age 60-69                   |             |           | 0.004    |           |           |                      |          | 0.080    |          |          |
| Openness × Age 70-79                   |             |           | 0.017    |           |           |                      |          | -0.021   |          |          |
| Openness × Age 80+                     |             |           | 0.043    |           |           |                      |          | 0.045    |          |          |
| Agreeableness × Age 60-69              |             |           | -0.077   |           |           |                      |          | -0.093   |          |          |
| Agreeableness × Age 70-79              |             |           | -0.125*  |           |           |                      |          | -0.128*  |          |          |
| Agreeableness × Age 80+                |             |           | -0.037   |           |           |                      |          | -0.003   |          |          |
| Conscientiousness × Age 60-69          |             |           | -0.059   |           |           |                      |          | -0.056   |          |          |

|                                            |  |  |  |  |  |  |  |  |  |  |
|--------------------------------------------|--|--|--|--|--|--|--|--|--|--|
| Conscientiousness × Age 70-79              |  |  |  |  |  |  |  |  |  |  |
| Conscientiousness × Age 80+                |  |  |  |  |  |  |  |  |  |  |
| <i>Personality traits × Gender</i>         |  |  |  |  |  |  |  |  |  |  |
| Neuroticism × Women                        |  |  |  |  |  |  |  |  |  |  |
| Extraversion × Women                       |  |  |  |  |  |  |  |  |  |  |
| Openness × Women                           |  |  |  |  |  |  |  |  |  |  |
| Agreeableness × Women                      |  |  |  |  |  |  |  |  |  |  |
| Conscientiousness × Women                  |  |  |  |  |  |  |  |  |  |  |
| <i>Personality traits × Race/ethnicity</i> |  |  |  |  |  |  |  |  |  |  |
| Neuroticism × Black                        |  |  |  |  |  |  |  |  |  |  |
| Neuroticism × Hispanic                     |  |  |  |  |  |  |  |  |  |  |
| Neuroticism × Other                        |  |  |  |  |  |  |  |  |  |  |
| Extraversion × Black                       |  |  |  |  |  |  |  |  |  |  |
| Extraversion × Hispanic                    |  |  |  |  |  |  |  |  |  |  |
| Extraversion × Other                       |  |  |  |  |  |  |  |  |  |  |
| Openness × Black                           |  |  |  |  |  |  |  |  |  |  |
| Openness × Hispanic                        |  |  |  |  |  |  |  |  |  |  |
| Openness × Other                           |  |  |  |  |  |  |  |  |  |  |
| Agreeableness × Black                      |  |  |  |  |  |  |  |  |  |  |
| Agreeableness × Hispanic                   |  |  |  |  |  |  |  |  |  |  |
| Agreeableness × Other                      |  |  |  |  |  |  |  |  |  |  |
| Conscientiousness × Black                  |  |  |  |  |  |  |  |  |  |  |
| Conscientiousness × Hispanic               |  |  |  |  |  |  |  |  |  |  |
| Conscientiousness × Other                  |  |  |  |  |  |  |  |  |  |  |
| <i>Social support</i>                      |  |  |  |  |  |  |  |  |  |  |
| Received social support                    |  |  |  |  |  |  |  |  |  |  |
| Gave social support                        |  |  |  |  |  |  |  |  |  |  |
| <i>Covariates</i>                          |  |  |  |  |  |  |  |  |  |  |
| Adjusted R <sup>2</sup>                    |  |  |  |  |  |  |  |  |  |  |

Notes. Standardized coefficients ( $\beta$ ) are presented; ref. = reference group; Models 2-5 are adjusted for health, sociodemographic, and psychosocial characteristics. †  $p < .10$ , \*  $p < .05$ , \*\*  $p < .01$ , \*\*\*  $p < .001$ .

Supplementary Table 3. OLS regression predicting practicing keeping distancing and using sanitizers during the COVID-19 pandemic, 2020 HRS ( $N = 1,006$ )

| Variables                              | Kept Distancing |          |          |          |         | Used Sanitizers |          |          |          |          |
|----------------------------------------|-----------------|----------|----------|----------|---------|-----------------|----------|----------|----------|----------|
|                                        | Model 1         | Model 2  | Model 3  | Model 4  | Model 5 | Model 1         | Model 2  | Model 3  | Model 4  | Model 5  |
| <i>Main effects</i>                    |                 |          |          |          |         |                 |          |          |          |          |
| <i>Personality traits</i>              |                 |          |          |          |         |                 |          |          |          |          |
| Neuroticism                            | 0.005           | -0.046   | -0.014   | -0.067   | -0.027  | 0.039           | 0.012    | -0.021   | -0.003   | 0.056    |
| Extraversion                           | -0.030          | -0.034   | -0.013   | 0.000    | -0.081  | 0.042           | 0.001    | -0.037   | 0.018    | -0.035   |
| Openness                               | 0.073†          | 0.077†   | 0.133    | 0.103†   | 0.115*  | 0.001           | 0.048    | 0.102    | 0.103†   | 0.067    |
| Agreeableness                          | -0.009          | -0.035   | -0.013   | -0.027   | 0.013   | 0.103**         | 0.055    | 0.098    | 0.063    | 0.103*   |
| Conscientiousness                      | 0.080*          | 0.108**  | 0.041    | 0.093†   | 0.134** | 0.097**         | 0.097**  | 0.078    | 0.064    | 0.124**  |
| <i>Age</i>                             |                 |          |          |          |         |                 |          |          |          |          |
| Age 50-59 (ref.)                       |                 |          |          |          |         |                 |          |          |          |          |
| Age 60-69                              |                 | 0.051    | 0.058    | 0.052    | 0.058   |                 | 0.081†   | 0.083†   | 0.082*   | 0.085*   |
| Age 70-79                              |                 | 0.054    | 0.062    | 0.054    | 0.054   |                 | 0.051    | 0.048    | 0.052    | 0.053    |
| Age 80+                                |                 | 0.040    | 0.062†   | 0.042    | 0.041   |                 | 0.024    | 0.041    | 0.026    | 0.030    |
| <i>Gender</i>                          |                 |          |          |          |         |                 |          |          |          |          |
| Men (ref.)                             |                 |          |          |          |         |                 |          |          |          |          |
| Women                                  |                 | 0.105**  | 0.108**  | 0.107**  | 0.101** |                 | 0.137*** | 0.135*** | 0.139*** | 0.138*** |
| <i>Race/ethnicity</i>                  |                 |          |          |          |         |                 |          |          |          |          |
| Non-Hispanic White (ref.)              |                 |          |          |          |         |                 |          |          |          |          |
| Non-Hispanic Black (Black)             |                 | 0.080*   | 0.079*   | 0.082*   | 0.081*  |                 | 0.113*** | 0.111**  | 0.116*** | 0.102**  |
| Hispanic                               |                 | 0.132*** | 0.131*** | 0.135*** | 0.113** |                 | 0.143*** | 0.148*** | 0.145*** | 0.124*** |
| Non-Hispanic Other race (Other)        |                 | 0.093**  | 0.096**  | 0.092**  | 0.089** |                 | 0.041    | 0.038    | 0.039    | 0.030    |
| <i>Interaction effects</i>             |                 |          |          |          |         |                 |          |          |          |          |
| <i>Personality traits × Age groups</i> |                 |          |          |          |         |                 |          |          |          |          |
| Neuroticism × Age 60-69                |                 |          | -0.056   |          |         |                 |          | 0.027    |          |          |
| Neuroticism × Age 70-79                |                 |          | 0.027    |          |         |                 |          | 0.006    |          |          |
| Neuroticism × Age 80+                  |                 |          | -0.035   |          |         |                 |          | 0.053    |          |          |
| Extraversion × Age 60-69               |                 |          | 0.016    |          |         |                 |          | 0.014    |          |          |
| Extraversion × Age 70-79               |                 |          | -0.031   |          |         |                 |          | 0.062    |          |          |
| Extraversion × Age 80+                 |                 |          | -0.090†  |          |         |                 |          | -0.029   |          |          |
| Openness × Age 60-69                   |                 |          | -0.044   |          |         |                 |          | 0.006    |          |          |
| Openness × Age 70-79                   |                 |          | -0.068   |          |         |                 |          | -0.121*  |          |          |
| Openness × Age 80+                     |                 |          | 0.042    |          |         |                 |          | 0.038    |          |          |
| Agreeableness × Age 60-69              |                 |          | -0.005   |          |         |                 |          | -0.055   |          |          |
| Agreeableness × Age 70-79              |                 |          | -0.033   |          |         |                 |          | -0.004   |          |          |
| Agreeableness × Age 80+                |                 |          | 0.007    |          |         |                 |          | -0.051   |          |          |
| Conscientiousness × Age 60-69          |                 |          | 0.052    |          |         |                 |          | 0.017    |          |          |



|                                            |            |          |          |          |          |          |            |          |          |          |          |        |        |        |        |        |        |
|--------------------------------------------|------------|----------|----------|----------|----------|----------|------------|----------|----------|----------|----------|--------|--------|--------|--------|--------|--------|
| Conscientiousness × Age 70-79              |            |          |          | 0.057    |          |          |            |          |          | -0.004   |          |        |        |        |        |        |        |
| Conscientiousness × Age 80+                |            |          |          | 0.006    |          |          |            |          |          | 0.067    |          |        |        |        |        |        |        |
| <u>Personality traits × Gender</u>         |            |          |          |          |          |          |            |          |          |          |          |        |        |        |        |        |        |
| Neuroticism × Women                        |            |          |          |          | 0.024    |          |            |          |          | 0.016    |          |        |        |        |        |        |        |
| Extraversion × Women                       |            |          |          |          | -0.043   |          |            |          |          | -0.020   |          |        |        |        |        |        |        |
| Openness × Women                           |            |          |          |          | -0.031   |          |            |          |          | -0.072   |          |        |        |        |        |        |        |
| Agreeableness × Women                      |            |          |          |          | -0.024   |          |            |          |          | -0.023   |          |        |        |        |        |        |        |
| Conscientiousness × Women                  |            |          |          |          | 0.025    |          |            |          |          | 0.051    |          |        |        |        |        |        |        |
| <u>Personality traits × Race/ethnicity</u> |            |          |          |          |          |          |            |          |          |          |          |        |        |        |        |        |        |
| Neuroticism × Black                        |            |          |          |          |          |          |            |          |          | -0.026   | -0.090*  |        |        |        |        |        |        |
| Neuroticism × Hispanic                     |            |          |          |          |          |          |            |          |          | -0.007   | 0.000    |        |        |        |        |        |        |
| Neuroticism × Other                        |            |          |          |          |          |          |            |          |          | -0.022   | -0.045   |        |        |        |        |        |        |
| Extraversion × Black                       |            |          |          |          |          |          |            |          |          | 0.031    | 0.044    |        |        |        |        |        |        |
| Extraversion × Hispanic                    |            |          |          |          |          |          |            |          |          | 0.131**  | 0.093*   |        |        |        |        |        |        |
| Extraversion × Other                       |            |          |          |          |          |          |            |          |          | -0.013   | -0.005   |        |        |        |        |        |        |
| Openness × Black                           |            |          |          |          |          |          |            |          |          | -0.055   | -0.044   |        |        |        |        |        |        |
| Openness × Hispanic                        |            |          |          |          |          |          |            |          |          | -0.023   | -0.009   |        |        |        |        |        |        |
| Openness × Other                           |            |          |          |          |          |          |            |          |          | -0.011   | 0.044    |        |        |        |        |        |        |
| Agreeableness × Black                      |            |          |          |          |          |          |            |          |          | -0.047   | -0.076   |        |        |        |        |        |        |
| Agreeableness × Hispanic                   |            |          |          |          |          |          |            |          |          | -0.104*  | -0.065   |        |        |        |        |        |        |
| Agreeableness × Other                      |            |          |          |          |          |          |            |          |          | 0.022    | -0.057   |        |        |        |        |        |        |
| Conscientiousness × Black                  |            |          |          |          |          |          |            |          |          | -0.012   | 0.017    |        |        |        |        |        |        |
| Conscientiousness × Hispanic               |            |          |          |          |          |          |            |          |          | -0.041   | -0.050   |        |        |        |        |        |        |
| Conscientiousness × Other                  |            |          |          |          |          |          |            |          |          | 0.013    | -0.066†  |        |        |        |        |        |        |
| <u>Social support</u>                      |            |          |          |          |          |          |            |          |          |          |          |        |        |        |        |        |        |
| Received social support                    |            |          |          |          |          |          |            |          |          | 0.056†   | 0.060†   | 0.057† | 0.054  | 0.025  | 0.025  | 0.026  | 0.020  |
| Gave social support                        |            |          |          |          |          |          |            |          |          | 0.055†   | 0.049    | 0.058† | 0.054† | 0.069* | 0.067* | 0.072* | 0.068* |
| <u>Covariates</u>                          |            |          |          |          |          |          |            |          |          |          |          |        |        |        |        |        |        |
|                                            | Unadjusted | Adjusted | Adjusted | Adjusted | Adjusted | Adjusted | Unadjusted | Adjusted | Adjusted | Adjusted | Adjusted |        |        |        |        |        |        |
| Adjusted R <sup>2</sup>                    | .007       | .058     | .059     | .057     | .060     | .030     | .087       | .088     | .086     | .093     |          |        |        |        |        |        |        |

Notes. Standardized coefficients ( $\beta$ ) are presented; ref. = reference group; Models 2-5 are adjusted for health, sociodemographic, and psychosocial characteristics. †  $p < .10$ , \*  $p < .05$ , \*\*  $p < .01$ , \*\*\*  $p < .001$ .
